# Supplementary material
Source: Springer Nature journal article supplement (https://www.springermedizin.de/resource/supplementary/12888_2011_1205_MOESM3_ESM.pdf/9480648)

30 mg/d LDX  
(n=44)

50 mg/d LDX  
(n=112)

70 mg/d LDX  
(n=171)

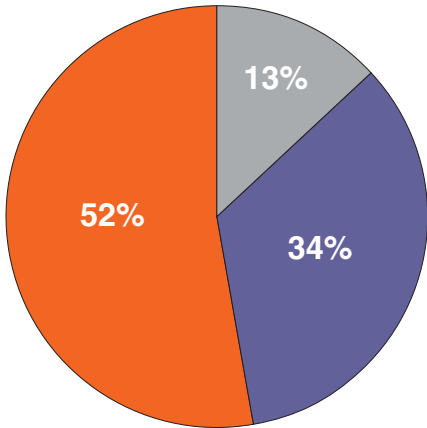

Supplement: MOESM3 [file 9480648]
